# Supplementary material for: Apple Pomace Extract Improves MK-801-Induced Memory Impairment in Mice
Source: MDPI journal article supplement (doi:10.3390/nu16020194), 2024-01-06
Supplement: s1 [file s1]

Table S1. Primer sequences used for real-time PCR analysis

| Gene                            | Primer Sequence                   |                                 |
|---------------------------------|-----------------------------------|---------------------------------|
|                                 | Forward                           | Reverse                         |
| <i>Zfp125</i>                   | 5'-TCGTACGGGAGACATGCTATGAA-3'     | 5'-GAGTTCCTTAAAGAGGAAATGACCA-3' |
| <i>Gstp1</i>                    | 5'-ATGTCACCCTCATCTACACCAAC-3'     | 5'-CAGGGTCTCAAAAGGCTTCA-3'      |
| <i>Zbed6</i>                    | 5'-TGCCTAGTACCAGAGCCAAAA-3'       | 5'-GGTTACAAATTGCTCTCCAGGT-3'    |
| <i>mt-Nd5</i>                   | 5'-GAACTTAAAATAAGCTTCAAAACTGAC-3' | 5'-ATAATTGATCATGTGACAAAAAGG-3'  |
| <i><math>\beta</math>-actin</i> | 5'-ACTGTCGAGTCGCGTCCA-3'          | 5'-GCAGCGATATCGTCATCCAT-3'      |
